# Supplementary material for: The zinc transporter ZIP9 (Slc39a9) regulates zinc dynamics essential to egg activation in zebrafish
Source: PubMed Central journal article supplement (PMC7518430; doi:10.1038/s41598-020-72515-4), 2020-09-24
Supplement: 41598_2020_72515_MOESM6_ESM.pdf [file 41598_2020_72515_MOESM6_ESM.pdf]

## Supplementary Materials

# **The zinc transporter ZIP9 (Slc39a9) regulates zinc dynamics essential to egg activation in zebrafish**

Aubrey Converse<sup>1</sup>, Peter Thomas<sup>1</sup>

<sup>1</sup>Marine Science Institute, The University of Texas at Austin, Port Aransas, Texas, U.S.A

## Supplementary Table 1

### Primers used for qPCR.

| <b>Primer</b> | <b>Forward</b>       | <b>Reverse</b>         |
|---------------|----------------------|------------------------|
| <i>zip9</i>   | AGCAGCTCCACGCTTACATT | CATGGACGACCAATCCGAGT   |
| <i>18s</i>    | AGAAACGGCTACCACATCCA | TCCCGAGATCCAACACTACGAG |

## Supplementary Table 2

### Oligonucleotide sequences used in gRNA generation and stop codon cassette.

| <b>Primer</b>                                  | <b>(5'-3')</b>                                                                       |
|------------------------------------------------|--------------------------------------------------------------------------------------|
| <b>Exon 3 specific</b>                         | TAATACGACTCACTATAGAAGGAGTGGTGAGACCCAGGTTTTAGA<br>GCTAGAAATAGCAAG                     |
| <b>tracrRNA tail</b>                           | AAAAGCACCGACTCGGTGCCACTTTTTCAAGTTGATAACGGACTA<br>GCCTTATTTTAACTTGCTATTTCTAGCTCTAAAAC |
| <b>Exon 3 specific stop<br/>codon cassette</b> | GCAGAAGGAGTGGTGAGACCGTCATGGCGTTTAAACCTTAATTAA<br>GCTGTTGTAGCAGCGGTGAACACGGCCACG      |

## Supplementary Table 3

### Primers used in screening assays.

| <b>Primer</b>                      | <b>Forward</b>         | <b>Reverse</b>          |
|------------------------------------|------------------------|-------------------------|
| <b>Heteroduplex mobility assay</b> | ATGCATTGTGCTGCTAGTTGTT | CCAGAGAAATCCCAATGTAAGC  |
| <b>Stop cassette specific</b>      | GGTGAGACCGTCATGGCGTTTA | CGCAGTGTGAGCCAATCCAAATA |
| <b>Homo/heterozygous screening</b> | ATGCATTGTGCTGCTAGTTGTT | CGCAGTGTGAGCCAATCCAAATA |

# Supplementary Figure 1

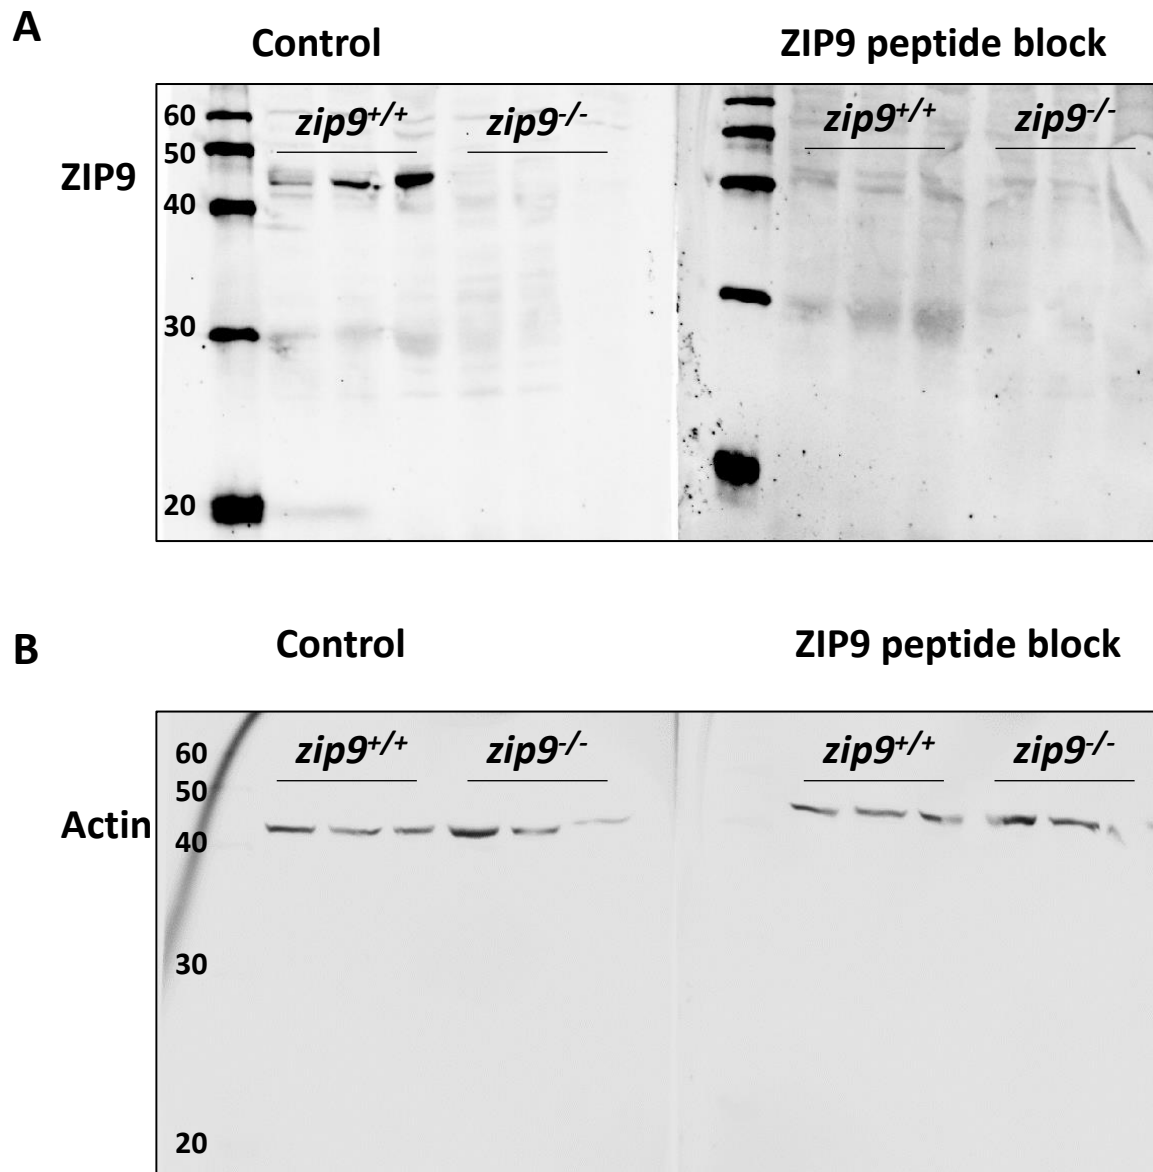

Supplementary Figure 1. Zebrafish ZIP9 antibody validation. A-B, Western blots of plasma membrane fractions (5  $\mu$ g) from *zip9*<sup>+/+</sup> and *zip9*<sup>-/-</sup> ovaries incubated with control or peptide blocked ZIP9 antibody (A), or actin housekeeping control (B).

## Supplementary Figure 2

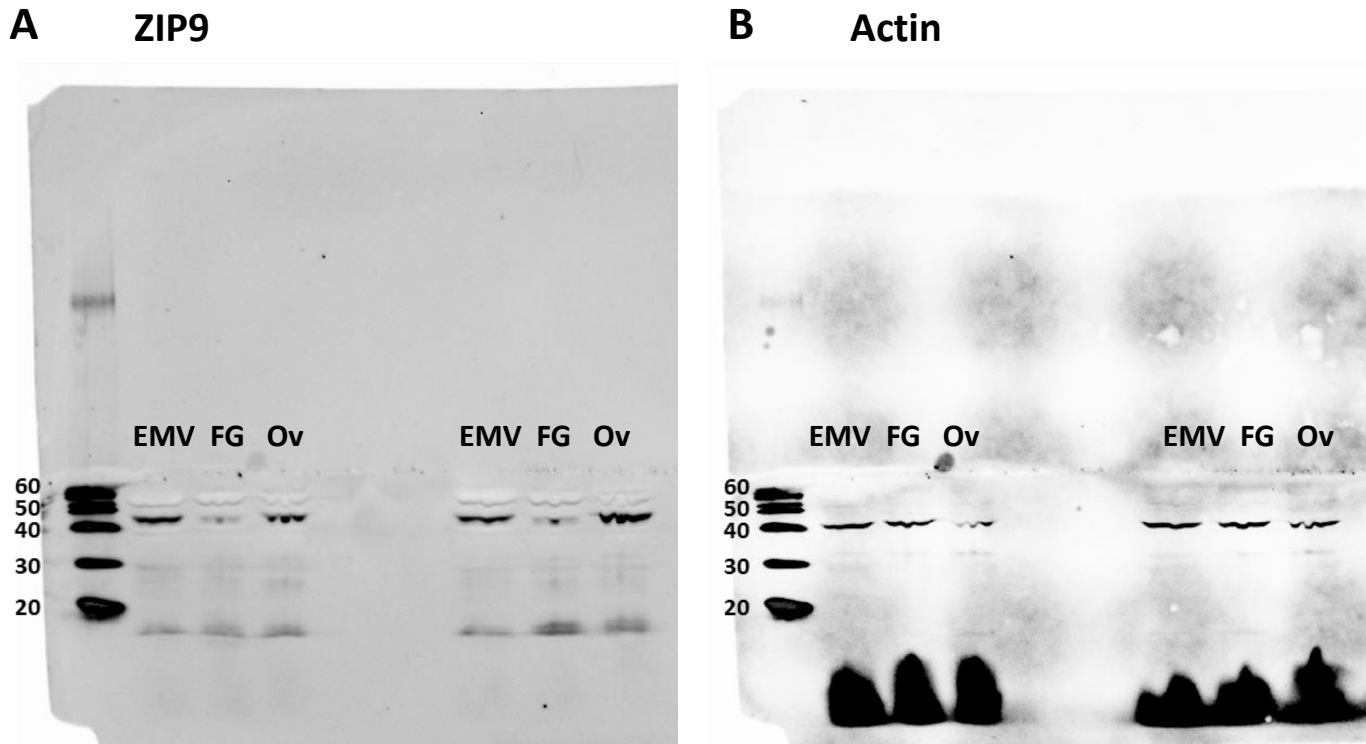

Supplementary Figure 2. Full blots of Figure 1B; ZIP9 protein expression on plasma membrane of different stage oocytes/eggs. A, Detection of ZIP9 antibody. B, Detection of Actin antibody. Two representative samples of each stage shown. EMV, early-mid vitellogenic oocytes; FG, full grown oocytes; Ov, ovulated eggs.

# Supplementary Figure 3

**A**

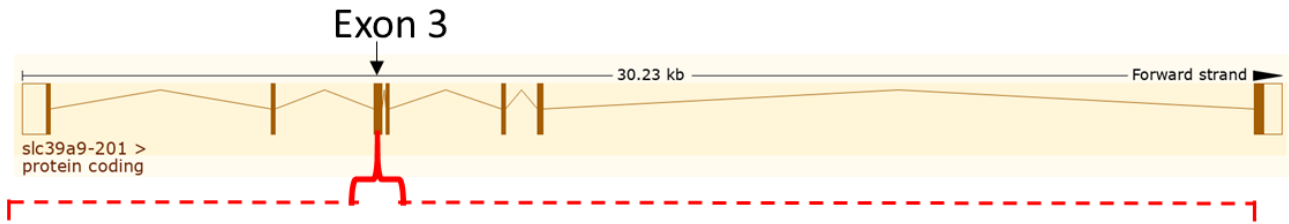

*zip9*<sup>+/+</sup> 5' CAGAAGGAGTGGTGAGACCC-----AGC-----GGTGAACACGGCCACGG 3'  
 |||||  
*zip9*<sup>-/-</sup> CAGAAGGAGTGGTGAGACCCCTTGTAA\*ACGCCATGTCATGGCGTTTAAACCTTAATTAAGCTGTTGTAGATGAGGAAATGCTGGAAAGGTGAACACGGCCACGG  
 |||||

**B**

**ZIP9**<sup>+/+</sup>

MDDFSSISLLSLSMLIGCYVAGTIPLAVN  
 FSEEKCLKLVTVLGAGLLCGTALAVIIEG  
 VHALYEEMLGVHNHGHGQVEAEVSEQ  
 KVAEGVVRP)SGEHGHGHEQLHAYIGISL  
 VLGFFVFM)LLVDQIGSAHM)HSSDDPEAA  
 RAASSKITTTLGLVVHAAADGVALGAAAS  
 TSQTSVQLIVFVAIM)LHKAPAAFGLVSF  
 L)MHAGLERNRIRKHLV)FALAAPVLA)MVT  
 YVGLSQSSKEALSDVNATGVAM)LFSAGT  
 FLYVATVHVLPEVGG)MGGHSHSPGSA  
 GKGLSKLEV)GALVLGCL)IPLVLSIGHQH

**ZIP9**<sup>-/-</sup>

MDDFSSISLLSLSMLIGCYVAGTIPLAVN  
 FSEEKCLKLVTVLGAGLLCGTALAVIIEG  
 VHALYEEMLGVHNHGHGQVEAEVSEQ  
 KVAEGVVRP)L Stop

Supplementary Figure 3. *zip9* mutation generation. A, Schematic representation of *zip9*, and the comparison of mutant *zip9*<sup>-/-</sup> and *zip9*<sup>+/+</sup> exon 3 nucleotide sequence. B, Comparison of predicted ZIP9<sup>-/-</sup> and ZIP9<sup>+/+</sup> protein sequence. Highlighted nucleotide sequence designates the stop codon cassette, red-text nucleotides indicate stop codons, asterisk indicates stop codon resulting in truncation, red boxed-amino acids are adjacent to stop codon in ZIP9<sup>-/-</sup>.

## Supplementary Figure 4

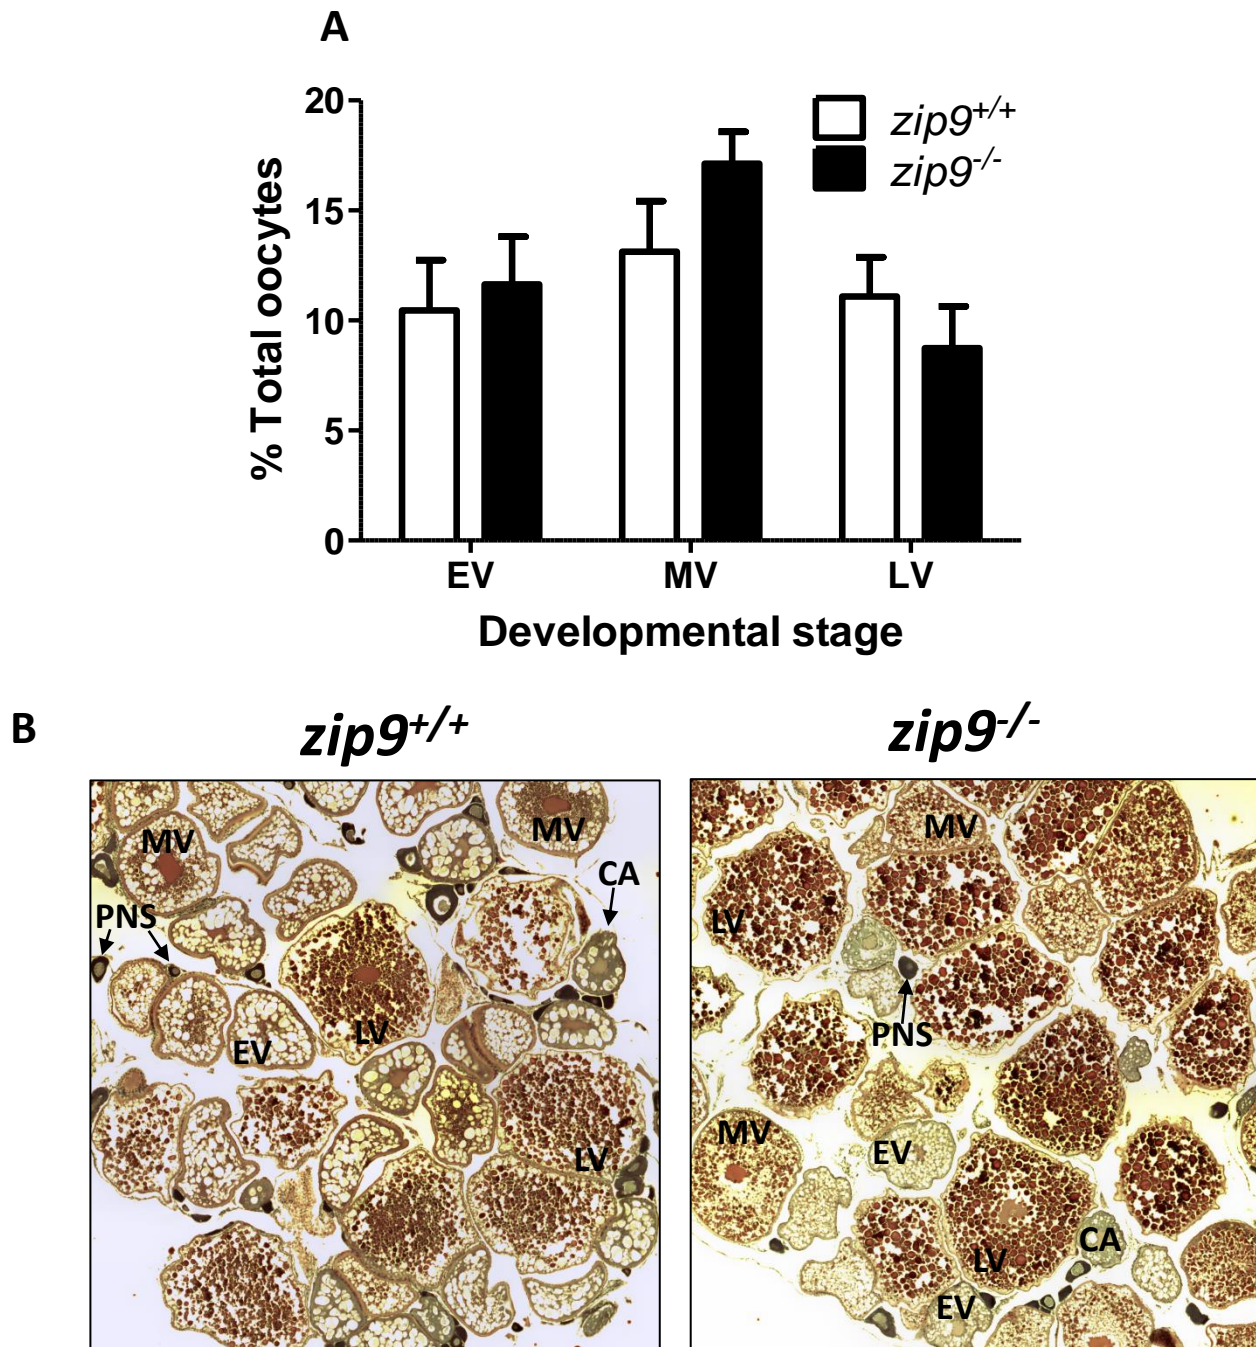

Supplementary Figure 4. Ovarian morphology of *zip9*<sup>-/-</sup> and *zip9*<sup>+/+</sup> fish. A, The relative proportion of ovarian follicles at different stages of development in *zip9*<sup>-/-</sup> and *zip9*<sup>+/+</sup> ovaries. B, Representative image of ovarian histology of *zip9*<sup>-/-</sup> and *zip9*<sup>+/+</sup> fish. All data represents means  $\pm$  SEM, n=5. PNS, perinuclear stage; CA, cortical alveoli stage; EV, early vitellogenic stage; MV, mid vitellogenic stage; LV, late vitellogenic stage.



## Supplementary Figure 5

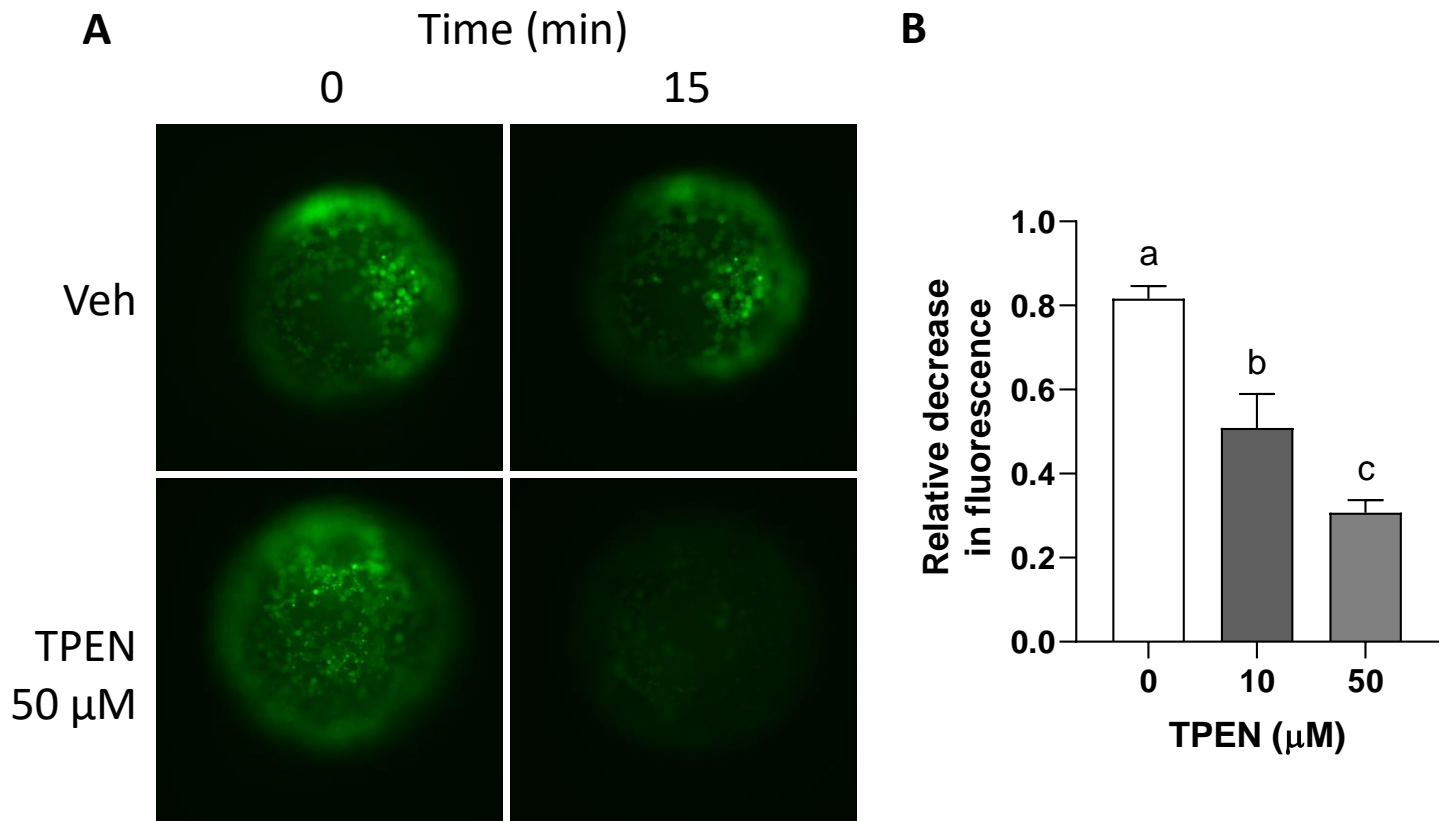

Supplementary Figure 5. Specificity of FluoZin-3-AM. A, Representative images of pre-activated WT eggs loaded with FluoZin-3-AM and treated with vehicle or TPEN. B, Quantification of relative decrease of FluoZin-3-AM fluorescence in TPEN treated eggs. Data represents means  $\pm$  SEM, n=6 (2 replicate egg from 3 fish). Significance was determined by one-way ANOVA with Bonferroni multiple comparison post-test. Different letters indicate significant differences between treatment groups in the post hoc test ( $P < 0.05$ ).

## Supplementary Figure 6

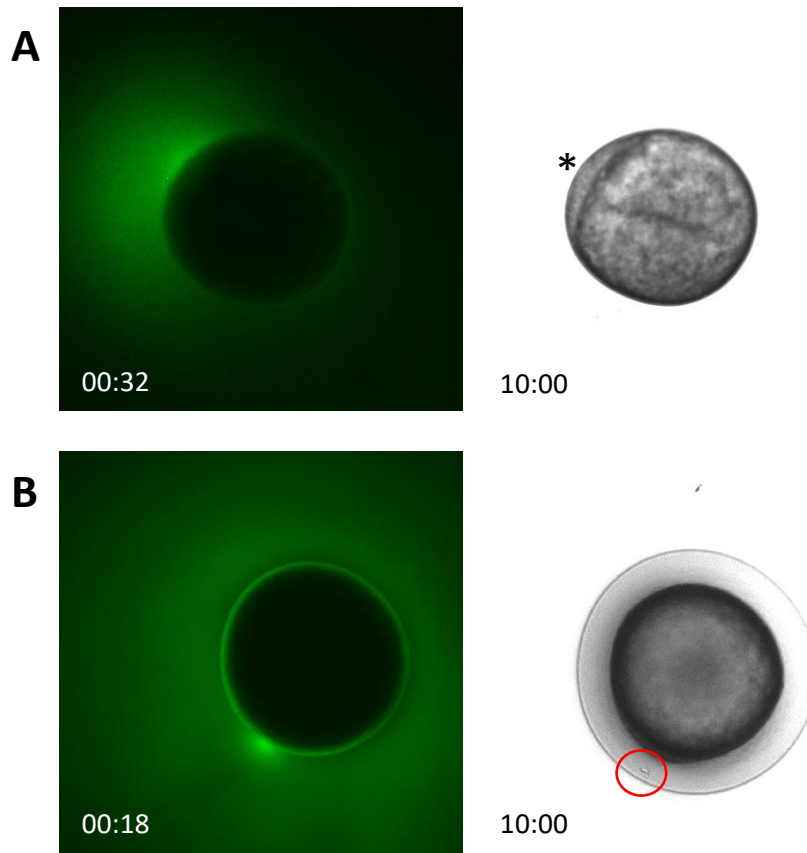

Supplementary Figure 6. Zinc exocytosis begins at the animal pole. A-B, FluoZin-3 fluorescence from WT eggs during zinc exocytosis (left) and brightfield images (right) 10 min post activation showing the blastodisc (\*) and micropyle (red circle) respectively.

## Description of supplemental movies

Supplemental Movie 1. Loss of zinc containing cortical vesicles upon activation of a representative wildtype egg. Scale bar: 100  $\mu\text{m}$ . Images taken every 20 s for a total of 10 min.

Supplemental Movie 2. Loss of zinc containing cortical vesicles upon activation of a representative *zip9*<sup>-/-</sup> egg. Scale bar: 100  $\mu\text{m}$ . Images taken every 20 s for a total of 10 min.

Supplemental Movie 3. Increase in extracellular zinc upon activation of a representative wildtype egg. Scale bar: 200  $\mu\text{m}$ . Images taken every 2 s for a total of 10 min.

Supplemental Movie 4. Increase in extracellular zinc upon activation of a representative *zip9*<sup>-/-</sup> egg. Scale bar: 200  $\mu\text{m}$ . Images taken every 2 s for a total of 10 min.

Supplemental Movie 5. A rise in intracellular calcium proceeds zinc exocytosis in a representative WT egg. Images taken every  $\sim 3.4$  seconds for 5 min. green, extracellular zinc; purple, intracellular calcium.
